# Supplementary material for: Experimental Investigation of Water–Sand Mixed Fluid Initiation and Migration in Porous Skeleton during Water and Sand Inrush
Source: Hindawi journal article supplement (doi:10.1155/2020/8679861), 2020-08-03
Supplement: f1 [file 8679861.f1.pdf]

## Experimental data:

Table 1. Water and sand flow rates for the tests of sand particles migration in sand–quartz–filled bed

| time (s) | 0.095 MPa                           |                                      | 0.17 MPa                            |                                      | 0.23 MPa                            |                                      | 0.25 MPa                            |                                      | 0.377 MPa                           |                                      |
|----------|-------------------------------------|--------------------------------------|-------------------------------------|--------------------------------------|-------------------------------------|--------------------------------------|-------------------------------------|--------------------------------------|-------------------------------------|--------------------------------------|
|          | Sand flow rate (cm <sup>3</sup> /s) | Water flow rate (cm <sup>3</sup> /s) | Sand flow rate (cm <sup>3</sup> /s) | Water flow rate (cm <sup>3</sup> /s) | Sand flow rate (cm <sup>3</sup> /s) | Water flow rate (cm <sup>3</sup> /s) | Sand flow rate (cm <sup>3</sup> /s) | Water flow rate (cm <sup>3</sup> /s) | Sand flow rate (cm <sup>3</sup> /s) | Water flow rate (cm <sup>3</sup> /s) |
| 0        | 0                                   | 0                                    | 0                                   | 0                                    | 0                                   | 0                                    | 0                                   | 0                                    | 0                                   | 0                                    |
| 3        | 2.26337                             | 8.97119                              | 2.6749                              | 11.8642                              | 3.90947                             | 46.69136                             | 4.52675                             | 65.69959                             | 8.02469                             | 90.30864                             |
| 6        | 3.68486                             | 18.29218                             | 4.32099                             | 26.15226                             | 5.04115                             | 62.38272                             | 5.96708                             | 69.08025                             | 8.12757                             | 83.37243                             |
| 9        | 4.27526                             | 24.19616                             | 4.95084                             | 39.84499                             | 5.36236                             | 61.19204                             | 6.0608                              | 76.11797                             | 7.40741                             | 82.81481                             |
| 12       | 4.26955                             | 22.64403                             | 4.60476                             | 38.46296                             | 4.93827                             | 60.66049                             | 5.67728                             | 79.63683                             | 7.02416                             | 83.59671                             |
| 15       | 4.03292                             | 25.1572                              | 4.29355                             | 37.65926                             | 4.74005                             | 60.00988                             | 5.52948                             | 68.0214                              | 6.13169                             | 107.57942                            |
| 18       | 3.80658                             | 23.36694                             | 4.08722                             | 37.12346                             | 4.31916                             | 54.13306                             | 4.99141                             | 60.61797                             | 5.41838                             | 96.738                               |
| 21       | 3.52734                             | 23.61905                             | 3.76249                             | 38.03469                             | 4.02974                             | 48.42269                             | 4.5429                              | 54.41858                             | 4.82608                             | 90.28395                             |
| 24       | 3.3179                              | 30.01132                             | 3.62654                             | 36.70885                             | 3.88001                             | 45.59105                             | 4.15037                             | 48.25412                             | 4.28643                             | 79.83436                             |
| 27       | 3.36915                             | 34.89803                             | 3.54367                             | 35.22405                             | 3.65135                             | 43.99817                             | 3.73075                             | 46.26612                             | 3.8243                              | 74.26246                             |
| 30       | 3.35391                             | 32.79877                             | 3.37449                             | 38.62881                             | 3.40682                             | 41.62675                             | 3.43621                             | 43.19588                             | 3.45679                             | 67.65985                             |

Table 2. Mass of SFO and porosity for the tests of sand particles migration in sand–quartz–filled bed

| time (s) | 0.095 MPa   |          | 0.17 MPa          |          | 0.23 MPa          |          | 0.25 MPa          |          | 0.377 MPa         |          |
|----------|-------------|----------|-------------------|----------|-------------------|----------|-------------------|----------|-------------------|----------|
|          | Mass of SFO | Porosity | Mass of loss sand | Porosity |
| 0        | 0           | 30.94    | 0                 | 30.94    | 0                 | 30.94    | 0                 | 30.94    | 0                 | 30.94    |
| 3        | 17.79012    | 32.1388  | 21.02469          | 32.35723 | 30.7284           | 33.01252 | 35.58025          | 33.34017 | 63.07407          | 35.19683 |
| 6        | 57.92593    | 34.84917 | 67.92593          | 35.52447 | 79.24691          | 36.28898 | 93.80247          | 37.27191 | 127.76543         | 39.56543 |
| 9        | 100.8107    | 37.74518 | 116.74074         | 38.82093 | 126.44444         | 39.47622 | 142.91358         | 40.58838 | 174.66667         | 42.73267 |
| 12       | 134.23457   | 40.00229 | 144.77366         | 40.714   | 155.25926         | 41.42209 | 178.49383         | 42.99112 | 220.83951         | 45.85072 |
| 15       | 158.49383   | 41.64052 | 168.73663         | 42.33221 | 186.28395         | 43.51718 | 217.30864         | 45.61228 | 240.97531         | 47.21049 |
| 18       | 179.51852   | 43.06032 | 192.75309         | 43.95405 | 203.69136         | 44.69271 | 235.39506         | 46.83366 | 255.53086         | 48.19343 |
| 21       | 194.07407   | 44.04325 | 207.01235         | 44.91697 | 221.71605         | 45.90991 | 249.95062         | 47.81659 | 265.53086         | 48.86873 |
| 24       | 208.62963   | 45.02619 | 228.03704         | 46.33677 | 243.97531         | 47.41308 | 260.97531         | 48.56109 | 269.53086         | 49.13885 |
| 27       | 238.33333   | 47.03208 | 250.67901         | 47.86578 | 258.2963          | 48.38018 | 263.91358         | 48.75951 | 270.53086         | 49.20638 |
| 30       | 263.61728   | 48.7395  | 265.23457         | 48.84872 | 267.77601         | 49.02034 | 270.08642         | 49.17636 | 271.7037          | 49.28558 |

Table 3. Change rate of porosity for the tests of sand particles migration in sand–quartz–filled bed

| time (s) | Change rate of porosity (min <sup>-1</sup> ) |          |          |          |           |
|----------|----------------------------------------------|----------|----------|----------|-----------|
|          | 0.095 MPa                                    | 0.17 MPa | 0.23 MPa | 0.25 MPa | 0.377 MPa |
| 0        | 0                                            | 0        | 0        | 0        | 0         |
| 3        | 0.23976                                      | 0.28345  | 0.4145   | 0.48003  | 0.85137   |
| 6        | 0.54207                                      | 0.63345  | 0.65529  | 0.78635  | 0.87372   |
| 9        | 0.5792                                       | 0.65929  | 0.63745  | 0.66329  | 0.63345   |
| 12       | 0.45142                                      | 0.37861  | 0.38917  | 0.48055  | 0.62361   |
| 15       | 0.32765                                      | 0.32364  | 0.41902  | 0.52423  | 0.27195   |
| 18       | 0.28396                                      | 0.32437  | 0.2351   | 0.24428  | 0.19659   |
| 21       | 0.19659                                      | 0.19259  | 0.24344  | 0.19659  | 0.13506   |
| 24       | 0.19659                                      | 0.28396  | 0.30063  | 0.1489   | 0.05402   |
| 27       | 0.40118                                      | 0.3058   | 0.19342  | 0.03968  | 0.01351   |
| 30       | 0.34148                                      | 0.19659  | 0.12803  | 0.08337  | 0.01584   |

Table .4 Sand flow rate for the tests of water–sand mixed fluid migration

| time (s) | Sand flow rate (cm <sup>3</sup> /s) |         |         |         |         |         |         |         |         |         |
|----------|-------------------------------------|---------|---------|---------|---------|---------|---------|---------|---------|---------|
|          | 1.14                                | 1.66    | 2.17    | 2.69    | 3.20    | 3.72    | 4.32    | 4.75    | 5.26    | 5.78    |
| 0        | 0                                   | 0       | 0       | 0       | 0       | 0       | 0       | 0       | 0       | 0       |
| 3        | 0.41152                             | 0.20576 | 0.20576 | 0.20576 | 0.20576 | 1.44033 | 1.44033 | 1.44033 | 1.23457 | 1.02881 |
| 6        | 0.92593                             | 0.5144  | 1.85185 | 1.13169 | 0.41152 | 1.33745 | 2.6749  | 2.77778 | 3.29218 | 3.1893  |
| 9        | 1.23457                             | 1.09739 | 1.98903 | 1.78326 | 1.44033 | 2.1262  | 3.15501 | 3.42936 | 4.18381 | 4.04664 |
| 12       | 1.33745                             | 1.13169 | 2.10905 | 2.00617 | 1.90329 | 2.52058 | 3.13786 | 3.7037  | 4.57819 | 4.52675 |
| 15       | 1.39918                             | 1.27572 | 2.05761 | 2.13992 | 2.13992 | 2.59259 | 3.29218 | 3.86831 | 4.81481 | 4.77366 |

|     |         |         |         |         |         |         |         |         |         |         |
|-----|---------|---------|---------|---------|---------|---------|---------|---------|---------|---------|
| 18  | 1.44033 | 1.37174 | 2.1262  | 2.1262  | 2.36626 | 2.81207 | 3.42936 | 4.01235 | 4.93827 | 5.00686 |
| 21  | 1.44033 | 1.44033 | 2.1458  | 2.17519 | 2.52792 | 2.93945 | 3.52734 | 4.17402 | 5.02646 | 5.20282 |
| 24  | 1.44033 | 1.44033 | 2.13477 | 2.21193 | 2.52058 | 3.0607  | 3.47222 | 4.29527 | 5.11831 | 5.37551 |
| 27  | 1.44033 | 1.48605 | 2.08048 | 2.26337 | 2.60631 | 3.0407  | 3.58939 | 4.41244 | 5.18976 | 5.48697 |
| 30  | 1.44033 | 1.52263 | 2.09877 | 2.22222 | 2.69547 | 3.16872 | 3.66255 | 4.50617 | 5.22634 | 5.57613 |
| 33  | 1.45903 | 1.55256 | 2.11373 | 2.26337 | 2.76842 | 3.27348 | 3.74111 | 4.58287 | 5.25627 | 5.63038 |
| 36  | 1.44033 | 1.52606 | 2.1262  | 2.29767 | 2.76063 | 3.36077 | 3.68656 | 4.62963 | 5.29835 | 5.70988 |
| 39  | 1.45616 | 1.55112 | 2.1051  | 2.35834 | 2.81735 | 3.35549 | 3.75119 | 4.6692  | 5.31814 | 5.76132 |
| 42  | 1.45503 | 1.5726  | 2.1311  | 2.35156 | 2.88066 | 3.42446 | 3.77719 | 4.70312 | 5.3351  | 5.80541 |
| 45  | 1.45405 | 1.5775  | 2.15364 | 2.40055 | 2.92181 | 3.47051 | 3.79973 | 4.73251 | 5.34979 | 5.84362 |
| 48  | 1.45319 | 1.56893 | 2.18621 | 2.44342 | 2.89352 | 3.52366 | 3.75514 | 4.75823 | 5.37551 | 5.88992 |
| 51  | 1.45243 | 1.58557 | 2.16655 | 2.48124 | 2.94118 | 3.49794 | 3.78843 | 4.79303 | 5.41031 | 5.93077 |
| 54  | 1.45176 | 1.58893 | 2.18336 | 2.46914 | 2.96068 | 3.5208  | 3.80658 | 4.82396 | 5.45267 | 5.95565 |
| 57  | 1.45116 | 1.6136  | 2.1984  | 2.49079 | 2.99978 | 3.54126 | 3.82283 | 4.84081 | 5.47975 | 5.96708 |
| 60  | 1.44033 | 1.60494 | 2.21193 | 2.51029 | 2.97325 | 3.54938 | 3.78601 | 4.85597 | 5.50412 | 5.97737 |
| 63  | 1.44033 | 1.62649 | 2.19479 | 2.52792 | 3.00803 | 3.51754 | 3.80169 | 4.86968 | 5.52616 | 6.00627 |
| 66  | 1.44968 | 1.63674 | 2.20726 | 2.5159  | 3.0303  | 3.53535 | 3.81594 | 4.88215 | 5.5462  | 6.02319 |
| 69  | 1.45822 | 1.65504 | 2.21864 | 2.5407  | 3.05064 | 3.56057 | 3.82895 | 4.89354 | 5.5645  | 6.03865 |
| 72  | 1.46605 | 1.64609 | 2.23765 | 2.56344 | 3.04355 | 3.58368 | 3.79801 | 4.92112 | 5.58128 | --      |
| 75  | 1.48148 | 1.66255 | 2.22222 | 2.57613 | 3.06996 | 3.56379 | 3.8107  | 4.95473 | 5.59671 |         |
| 78  | 1.49573 | 1.66983 | 2.23172 | 2.57202 | 3.08642 | 3.585   | 3.83824 | 4.96993 | 5.61887 |         |
| 81  | 1.50892 | 1.68419 | 2.24051 | 2.59107 | 3.10928 | 3.61225 | 3.87136 | 4.984   |         |         |
| 84  | 1.51382 | 1.67549 | 2.25603 | 2.60876 | 3.09377 | 3.63022 | 3.85802 | 5.00441 |         |         |
| 87  | 1.52547 | 1.68157 | 2.24209 | 2.63233 | 3.1148  | 3.61147 | 3.87399 | 5.02341 |         |         |
| 90  | 1.52949 | 1.6941  | 2.25652 | 2.62689 | 3.12757 | 3.62826 | 3.88889 | --      |         |         |
| 93  | 1.53989 | 1.69919 | 2.26337 | 2.64171 | 3.13952 | 3.64397 | 3.90283 |         |         |         |
| 96  | 1.54964 | 1.69753 | 2.27623 | 2.66204 | 3.125   | 3.66512 | 3.89017 |         |         |         |
| 99  | 1.55256 | 1.70221 | 2.26961 | 2.6749  | 3.14254 | 3.64135 |         |         |         |         |
| 102 | 1.56137 | 1.70661 | 2.27548 | 2.66885 | 3.15299 | 3.66134 |         |         |         |         |
| 105 | 1.56966 | 1.71664 | 2.28689 | 2.68078 | 3.15697 |         |         |         |         |         |
| 108 | 1.5775  | 1.70896 | 2.29767 | 2.69204 | 3.14358 |         |         |         |         |         |
| 111 | 1.58492 | 1.71839 | 2.29118 | 2.7027  | 3.15315 |         |         |         |         |         |
| 114 | 1.59194 | 1.7219  | 2.30128 | 2.69656 | 3.16223 |         |         |         |         |         |
| 117 | 1.59861 | 1.73051 | 2.31613 | 2.71183 |         |         |         |         |         |         |
| 120 | 1.60494 | 1.72325 | 2.33025 | 2.72634 |         |         |         |         |         |         |
| 123 | 1.60594 | 1.72639 | 2.3236  | 2.74014 |         |         |         |         |         |         |
| 126 | 1.6118  | 1.73427 | 2.33196 | 2.75328 |         |         |         |         |         |         |
| 129 | 1.61738 | 1.73701 | 2.33994 | 2.74667 |         |         |         |         |         |         |
| 132 | 1.62271 | 1.73027 | 2.35223 |         |         |         |         |         |         |         |
| 135 | 1.6278  | 1.73297 | 2.34568 |         |         |         |         |         |         |         |
| 138 | 1.6282  | 1.73555 | 2.35284 |         |         |         |         |         |         |         |
| 141 | 1.63296 | 1.73803 | 2.35969 |         |         |         |         |         |         |         |
| 144 | 1.63752 | 1.73611 | 2.36626 |         |         |         |         |         |         |         |
| 147 | 1.64189 | 1.74267 | 2.35576 |         |         |         |         |         |         |         |
| 150 | 1.64609 | 1.74486 | 2.36214 |         |         |         |         |         |         |         |
| 153 | 1.65013 | 1.74695 | 2.37231 |         |         |         |         |         |         |         |
| 156 | 1.654   | 1.74501 | 2.37813 |         |         |         |         |         |         |         |
| 159 | 1.65774 | 1.74703 | 2.37596 |         |         |         |         |         |         |         |

|     |         |         |
|-----|---------|---------|
| 162 | 1.65752 | 1.75278 |
| 165 | 1.66105 | 1.75832 |
| 168 | 1.66446 | 1.75265 |
| 171 | 1.66775 | 1.758   |
| 174 | 1.66738 | 1.75961 |
| 177 | 1.6705  | 1.76466 |
| 180 | 1.67353 | 1.75926 |
| 183 | 1.67308 | 1.76415 |
| 186 | 1.67596 | 1.76888 |
| 189 | 1.67875 | 1.7702  |
| 192 | 1.67824 | 1.76505 |
| 195 | 1.68091 | 1.76638 |
| 198 | 1.6835  | 1.77079 |
| 201 | 1.68294 | 1.77508 |
| 204 | 1.68543 | 1.77318 |
| 207 | 1.68784 | 1.7773  |
| 210 | 1.68724 | 1.78424 |
| 213 | 1.68956 | --      |
| 216 | 1.69182 | --      |
| 219 | 1.69401 |         |
| 222 | 1.69614 |         |
| 225 | 1.69822 |         |
| 228 | 1.70024 |         |
| 231 | 1.69954 |         |
| 234 | 1.70149 |         |
| 237 | 1.70339 |         |
| 240 | 1.70525 |         |
| 243 | 1.70452 |         |
| 246 | 1.70882 |         |
| 249 | 1.71055 |         |
| 252 | 1.71223 |         |
| 255 | 1.71387 |         |

Table 5. Water flow rate for the tests of water–sand mixed fluid migration

| time<br>(s) | Water flow rate (cm <sup>3</sup> /s) |         |         |         |         |         |         |         |         |         |
|-------------|--------------------------------------|---------|---------|---------|---------|---------|---------|---------|---------|---------|
|             | 1.14                                 | 1.66    | 2.17    | 2.69    | 3.20    | 3.72    | 4.32    | 4.75    | 5.26    | 5.78    |
| 0           | 0                                    | 0       | 0       | 0       | 0       | 0       | 0       | 0       | 0       | 0       |
| 3           | 1.58848                              | 0.46091 | 1.12757 | 0.79424 | 0.46091 | 0.893   | 3.22634 | 3.55967 | 1.09877 | 4.63786 |
| 6           | 1.07407                              | 2.15226 | 1.81481 | 0.86831 | 0.58848 | 2.16255 | 3.3251  | 4.05556 | 0.70782 | 3.3107  |
| 9           | 0.87654                              | 1.68038 | 1.89986 | 0.99451 | 0.893   | 2.42936 | 3.28944 | 3.45953 | 0.81619 | 3.06447 |
| 12          | 0.91255                              | 1.61831 | 1.89095 | 1.32716 | 1.34671 | 2.64609 | 3.61214 | 3.12963 | 0.75514 | 2.38992 |
| 15          | 0.80082                              | 1.52428 | 2.00905 | 1.52675 | 1.59342 | 2.94074 | 3.57449 | 2.59835 | 1.11852 | 2.42634 |
| 18          | 0.67078                              | 1.40604 | 1.92936 | 1.70713 | 1.80041 | 2.91015 | 3.51509 | 2.54321 | 1.06173 | 2.5487  |
| 21          | 0.60729                              | 1.36919 | 1.94944 | 1.77719 | 1.90065 | 2.9177  | 3.52028 | 2.54027 | 1.30688 | 2.55908 |
| 24          | 0.60134                              | 1.393   | 1.94856 | 1.82973 | 2.14609 | 2.9393  | 3.65278 | 2.57973 | 1.42335 | 2.29115 |
| 27          | 0.59671                              | 1.3658  | 1.95656 | 1.8107  | 2.2085  | 3.10745 | 3.66987 | 2.3283  | 1.55098 | 2.36488 |
| 30          | 0.593                                | 1.3107  | 1.93457 | 1.94444 | 2.27119 | 3.13128 | 3.67078 | 2.32716 | 1.44033 | 2.39053 |

|     |         |         |         |         |         |         |         |         |         |         |
|-----|---------|---------|---------|---------|---------|---------|---------|---------|---------|---------|
| 33  | 0.60157 | 1.29592 | 1.91657 | 1.94875 | 2.29218 | 3.15077 | 3.65282 | 2.29592 | 1.56192 | 2.43023 |
| 36  | 0.61523 | 1.33505 | 1.90158 | 1.98011 | 2.43381 | 3.19479 | 3.73011 | 2.31481 | 1.64609 | 2.26235 |
| 39  | 0.56948 | 1.32067 | 1.94619 | 2.00063 | 2.4647  | 3.28553 | 3.71035 | 2.17695 | 1.7075  | 2.31561 |
| 42  | 0.56878 | 1.28454 | 1.94033 | 2.07701 | 2.50029 | 3.28983 | 3.67519 | 2.20165 | 1.64109 | 2.36126 |
| 45  | 0.54595 | 1.28916 | 1.93525 | 2.11056 | 2.52263 | 3.28505 | 3.66694 | 2.20082 | 1.69465 | 2.40082 |
| 48  | 0.56764 | 1.30607 | 1.91795 | 2.13992 | 2.58565 | 3.28884 | 3.72402 | 2.22094 | 1.74949 | 2.27675 |
| 51  | 0.54757 | 1.29678 | 1.97071 | 2.14621 | 2.58824 | 3.34519 | 3.70177 | 2.10893 | 1.80537 | 2.30453 |
| 54  | 0.54824 | 1.31847 | 1.96479 | 2.19753 | 2.6134  | 3.33105 | 3.6749  | 2.12048 | 1.73251 | 2.32213 |
| 57  | 0.54884 | 1.29868 | 1.9595  | 2.21096 | 2.61425 | 3.31839 | 3.6684  | 2.14165 | 1.80095 | 2.34871 |
| 60  | 0.57634 | 1.3284  | 1.95473 | 2.22305 | 2.67675 | 3.30062 | 3.69733 | 2.14403 | 1.82922 | 2.27263 |
| 63  | 0.55967 | 1.32589 | 1.97982 | 2.23398 | 2.67451 | 3.32373 | 3.67451 | 2.06682 | 1.88654 | 2.29532 |
| 66  | 0.56547 | 1.33296 | 1.97456 | 2.27198 | 2.69697 | 3.32828 | 3.65376 | 2.08754 | 1.81743 | 2.32529 |
| 69  | 0.58526 | 1.33047 | 1.96976 | 2.27089 | 2.70299 | 3.32349 | 3.64931 | 2.09197 | 1.85579 | 2.33816 |
| 72  | 0.6034  | 1.35391 | 1.95679 | 2.28378 | 2.73422 | 3.30521 | 3.67421 | 2.12054 | 1.89095 | --      |
| 75  | 0.58519 | 1.35078 | 1.99111 | 2.29053 | 2.74337 | 3.35621 | 3.6693  | 2.04527 | 1.90996 |         |
| 78  | 0.59402 | 1.35581 | 1.98623 | 2.32542 | 2.74691 | 3.3509  | 3.66176 | 2.05571 | 1.97088 |         |
| 81  | 0.60219 | 1.35284 | 1.98171 | 2.33486 | 2.75492 | 3.35071 | 3.6595  | 2.06539 |         |         |
| 84  | 0.61714 | 1.36023 | 1.97016 | 2.34362 | 2.79909 | 3.35788 | 3.7015  | 2.07892 |         |         |
| 87  | 0.60096 | 1.36441 | 1.99929 | 2.34469 | 2.79325 | 3.38853 | 3.68923 | 2.01107 |         |         |
| 90  | 0.61495 | 1.36145 | 1.98793 | 2.38422 | 2.80576 | 3.38285 | 3.68889 | --      |         |         |
| 93  | 0.6214  | 1.36533 | 1.98394 | 2.4013  | 2.80672 | 3.38829 | 3.68857 |         |         |         |
| 96  | 0.62744 | 1.37539 | 1.98418 | 2.40046 | 2.83333 | 3.38696 | 3.72441 |         |         |         |
| 99  | 0.61915 | 1.3786  | 1.99302 | 2.41601 | 2.82716 | 3.41925 |         |         |         |         |
| 102 | 0.62491 | 1.38163 | 1.99903 | 2.439   | 2.8274  | 3.40729 |         |         |         |         |
| 105 | 0.63986 | 1.3786  | 1.99882 | 2.44303 | 2.83351 |         |         |         |         |         |
| 108 | 0.64472 | 1.38363 | 1.98937 | 2.44684 | 2.85642 |         |         |         |         |         |
| 111 | 0.6313  | 1.38071 | 2.00612 | 2.45045 | 2.84685 |         |         |         |         |         |
| 114 | 0.63613 | 1.38337 | 2.01451 | 2.47011 | 2.84655 |         |         |         |         |         |
| 117 | 0.64926 | 1.38061 | 2.00865 | 2.47621 |         |         |         |         |         |         |
| 120 | 0.6534  | 1.39342 | 2.01142 | 2.482   |         |         |         |         |         |         |
| 123 | 0.64609 | 1.39556 | 2.026   | 2.4875  |         |         |         |         |         |         |
| 126 | 0.65011 | 1.39271 | 2.02518 | 2.50069 |         |         |         |         |         |         |
| 129 | 0.65394 | 1.38702 | 2.03216 | 2.51689 |         |         |         |         |         |         |
| 132 | 0.65759 | 1.39852 | 2.02656 |         |         |         |         |         |         |         |
| 135 | 0.64627 | 1.39296 | 2.04691 |         |         |         |         |         |         |         |
| 138 | 0.65441 | 1.39488 | 2.04571 |         |         |         |         |         |         |         |
| 141 | 0.66492 | 1.39673 | 2.04457 |         |         |         |         |         |         |         |
| 144 | 0.66804 | 1.40278 | 2.04347 |         |         |         |         |         |         |         |
| 147 | 0.65743 | 1.40018 | 2.05241 |         |         |         |         |         |         |         |
| 150 | 0.66058 | 1.40181 | 2.05119 |         |         |         |         |         |         |         |
| 153 | 0.6636  | 1.40337 | 2.05253 |         |         |         |         |         |         |         |
| 156 | 0.66651 | 1.40883 | 2.05136 |         |         |         |         |         |         |         |
| 159 | 0.66302 | 1.4102  | 2.06429 |         |         |         |         |         |         |         |
| 162 | 0.66964 | 1.40154 |         |         |         |         |         |         |         |         |
| 165 | 0.67228 | 1.39925 |         |         |         |         |         |         |         |         |
| 168 | 0.67482 | 1.40807 |         |         |         |         |         |         |         |         |
| 171 | 0.66558 | 1.40575 |         |         |         |         |         |         |         |         |
| 174 | 0.6717  | 1.40705 |         |         |         |         |         |         |         |         |

|     |         |         |
|-----|---------|---------|
| 177 | 0.67413 | 1.40483 |
| 180 | 0.67647 | 1.41296 |
| 183 | 0.67119 | 1.41071 |
| 186 | 0.6735  | 1.40854 |
| 189 | 0.67575 | 1.40969 |
| 192 | 0.68113 | 1.41204 |
| 195 | 0.67293 | 1.40798 |
| 198 | 0.67508 | 1.40597 |
| 201 | 0.68024 | 1.409   |
| 204 | 0.68222 | 1.4131  |
| 207 | 0.67448 | 1.41594 |
| 210 | 0.67942 | 1.41576 |
| 213 | 0.68133 | --      |
| 216 | 0.68781 | --      |
| 219 | 0.68042 |         |
| 222 | 0.68224 |         |
| 225 | 0.68401 |         |
| 228 | 0.68573 |         |
| 231 | 0.68142 |         |
| 234 | 0.68313 |         |
| 237 | 0.68479 |         |
| 240 | 0.68642 |         |
| 243 | 0.68231 |         |
| 246 | 0.68549 |         |
| 249 | 0.68704 |         |
| 252 | 0.69253 |         |
| 255 | 0.68613 |         |

Table 6. Solid particle concentration for the tests of water–sand mixed fluid migration

| time<br>(s) | Water flow rate (cm <sup>3</sup> /s) |         |         |         |         |         |         |         |         |         |
|-------------|--------------------------------------|---------|---------|---------|---------|---------|---------|---------|---------|---------|
|             | 1.14                                 | 1.66    | 2.17    | 2.69    | 3.20    | 3.72    | 4.32    | 4.75    | 5.26    | 5.78    |
| 0           | 0                                    | 0       | 0       | 0       | 0       | 0       | 0       | 0       | 0       | 0       |
| 3           | 0.20576                              | 0.30864 | 0.15432 | 0.41152 | 0.30864 | 0.61728 | 0.30864 | 0.28807 | 0.5291  | 0.18155 |
| 6           | 0.46296                              | 0.1929  | 0.50505 | 0.56584 | 0.41152 | 0.38213 | 0.44582 | 0.4065  | 0.82305 | 0.49066 |
| 9           | 0.5848                               | 0.39506 | 0.51146 | 0.64198 | 0.61728 | 0.46673 | 0.48957 | 0.49781 | 0.83676 | 0.56906 |
| 12          | 0.59442                              | 0.41152 | 0.52726 | 0.60185 | 0.58563 | 0.48785 | 0.46487 | 0.54201 | 0.85841 | 0.65447 |
| 15          | 0.63599                              | 0.45561 | 0.50597 | 0.58361 | 0.57319 | 0.46854 | 0.47944 | 0.59819 | 0.81149 | 0.66301 |
| 18          | 0.68226                              | 0.49383 | 0.52427 | 0.55466 | 0.5679  | 0.49143 | 0.49383 | 0.61205 | 0.82305 | 0.66267 |
| 21          | 0.70342                              | 0.51266 | 0.52397 | 0.55035 | 0.57082 | 0.50186 | 0.5005  | 0.62166 | 0.79365 | 0.6703  |
| 24          | 0.70547                              | 0.50835 | 0.5228  | 0.54728 | 0.54012 | 0.51012 | 0.48733 | 0.62477 | 0.78242 | 0.70115 |
| 27          | 0.70707                              | 0.52108 | 0.51535 | 0.55556 | 0.54131 | 0.49457 | 0.49446 | 0.65459 | 0.76991 | 0.69881 |
| 30          | 0.70836                              | 0.5374  | 0.52036 | 0.53333 | 0.54271 | 0.50297 | 0.49944 | 0.65944 | 0.78395 | 0.69993 |
| 33          | 0.70806                              | 0.54505 | 0.52446 | 0.53735 | 0.54705 | 0.50955 | 0.50597 | 0.66623 | 0.77092 | 0.69851 |
| 36          | 0.7007                               | 0.53338 | 0.52788 | 0.53712 | 0.53146 | 0.51266 | 0.49706 | 0.66667 | 0.76296 | 0.71622 |
| 39          | 0.71886                              | 0.54012 | 0.51961 | 0.54103 | 0.53338 | 0.50527 | 0.50274 | 0.68202 | 0.75696 | 0.71331 |
| 42          | 0.71895                              | 0.55041 | 0.52343 | 0.531   | 0.53534 | 0.51003 | 0.50684 | 0.68114 | 0.76476 | 0.71087 |
| 45          | 0.72702                              | 0.55029 | 0.5267  | 0.53214 | 0.53666 | 0.51373 | 0.50889 | 0.68257 | 0.75943 | 0.7088  |

|     |         |         |         |         |         |         |         |         |         |         |
|-----|---------|---------|---------|---------|---------|---------|---------|---------|---------|---------|
| 48  | 0.7191  | 0.54571 | 0.53268 | 0.53311 | 0.52809 | 0.51723 | 0.50208 | 0.68178 | 0.75446 | 0.72121 |
| 51  | 0.72622 | 0.5501  | 0.52367 | 0.5362  | 0.53191 | 0.51116 | 0.50579 | 0.69444 | 0.7498  | 0.72016 |
| 54  | 0.72588 | 0.54651 | 0.52634 | 0.5291  | 0.53115 | 0.51385 | 0.5088  | 0.69465 | 0.75888 | 0.71947 |
| 57  | 0.72558 | 0.55407 | 0.52873 | 0.52976 | 0.53434 | 0.51625 | 0.51031 | 0.69328 | 0.75264 | 0.71756 |
| 60  | 0.71421 | 0.54714 | 0.53086 | 0.53034 | 0.52624 | 0.51816 | 0.50593 | 0.69371 | 0.75056 | 0.72453 |
| 63  | 0.72016 | 0.55091 | 0.52575 | 0.53086 | 0.52935 | 0.51416 | 0.50851 | 0.70204 | 0.7455  | 0.72351 |
| 66  | 0.71939 | 0.55115 | 0.52782 | 0.52547 | 0.5291  | 0.51508 | 0.51086 | 0.70048 | 0.75319 | 0.72147 |
| 69  | 0.7136  | 0.55436 | 0.52971 | 0.52804 | 0.53021 | 0.51722 | 0.51201 | 0.70053 | 0.7499  | 0.72088 |
| 72  | 0.70843 | 0.5487  | 0.53348 | 0.52885 | 0.52677 | 0.52021 | 0.50828 | 0.69886 | 0.74694 |         |
| 75  | 0.71685 | 0.55173 | 0.52743 | 0.52934 | 0.52809 | 0.515   | 0.50945 | 0.70782 | 0.74556 |         |
| 78  | 0.71575 | 0.55189 | 0.5291  | 0.52518 | 0.5291  | 0.51688 | 0.51177 | 0.7074  | 0.74032 |         |
| 81  | 0.71475 | 0.55455 | 0.53065 | 0.52601 | 0.53021 | 0.51878 | 0.51407 | 0.70701 |         |         |
| 84  | 0.71039 | 0.55192 | 0.53382 | 0.52677 | 0.525   | 0.51949 | 0.51035 | 0.7065  |         |         |
| 87  | 0.71738 | 0.55206 | 0.52862 | 0.5289  | 0.52721 | 0.51592 | 0.51221 | 0.71411 |         |         |
| 90  | 0.71323 | 0.55443 | 0.53164 | 0.52421 | 0.52712 | 0.5175  | 0.5132  | 0.71656 |         |         |
| 93  | 0.71249 | 0.55447 | 0.5329  | 0.52384 | 0.52798 | 0.51818 | 0.51411 |         |         |         |
| 96  | 0.7118  | 0.55242 | 0.53428 | 0.52583 | 0.52448 | 0.51972 | 0.51088 |         |         |         |
| 99  | 0.7149  | 0.55252 | 0.53244 | 0.52543 | 0.52641 | 0.51573 |         |         |         |         |
| 102 | 0.71417 | 0.55262 | 0.53234 | 0.5225  | 0.52722 | 0.51797 |         |         |         |         |
| 105 | 0.71041 | 0.55461 | 0.53361 | 0.5232  | 0.527   |         |         |         |         |         |
| 108 | 0.70988 | 0.5526  | 0.53596 | 0.52386 | 0.52393 |         |         |         |         |         |
| 111 | 0.71515 | 0.55448 | 0.53317 | 0.52448 | 0.52553 |         |         |         |         |         |
| 114 | 0.71449 | 0.55451 | 0.53322 | 0.52191 | 0.52627 |         |         |         |         |         |
| 117 | 0.71117 | 0.55623 | 0.53555 | 0.52271 |         |         |         |         |         |         |
| 120 | 0.71067 | 0.55291 | 0.53672 | 0.52346 |         |         |         |         |         |         |
| 123 | 0.71311 | 0.55298 | 0.53421 | 0.52416 |         |         |         |         |         |         |
| 126 | 0.71258 | 0.55462 | 0.5352  | 0.52404 |         |         |         |         |         |         |
| 129 | 0.71209 | 0.55602 | 0.5352  | 0.52183 |         |         |         |         |         |         |
| 132 | 0.71162 | 0.55301 | 0.53719 |         |         |         |         |         |         |         |
| 135 | 0.71581 | 0.55439 | 0.53401 |         |         |         |         |         |         |         |
| 138 | 0.71331 | 0.55441 | 0.53491 |         |         |         |         |         |         |         |
| 141 | 0.71064 | 0.55444 | 0.53577 |         |         |         |         |         |         |         |
| 144 | 0.71025 | 0.5531  | 0.5366  |         |         |         |         |         |         |         |
| 147 | 0.71408 | 0.55449 | 0.53441 |         |         |         |         |         |         |         |
| 150 | 0.71362 | 0.55451 | 0.53523 |         |         |         |         |         |         |         |
| 153 | 0.71319 | 0.55453 | 0.53613 |         |         |         |         |         |         |         |
| 156 | 0.71278 | 0.5533  | 0.53689 |         |         |         |         |         |         |         |
| 159 | 0.71431 | 0.55334 | 0.5351  |         |         |         |         |         |         |         |
| 162 | 0.71225 | 0.55568 |         |         |         |         |         |         |         |         |
| 165 | 0.71188 | 0.55686 |         |         |         |         |         |         |         |         |
| 168 | 0.71153 | 0.55451 |         |         |         |         |         |         |         |         |
| 171 | 0.71475 | 0.55567 |         |         |         |         |         |         |         |         |
| 174 | 0.71283 | 0.55567 |         |         |         |         |         |         |         |         |
| 177 | 0.71248 | 0.55677 |         |         |         |         |         |         |         |         |
| 180 | 0.71214 | 0.55458 |         |         |         |         |         |         |         |         |
| 183 | 0.71369 | 0.55566 |         |         |         |         |         |         |         |         |
| 186 | 0.71334 | 0.5567  |         |         |         |         |         |         |         |         |
| 189 | 0.713   | 0.55669 |         |         |         |         |         |         |         |         |

|     |         |         |
|-----|---------|---------|
| 192 | 0.71131 | 0.55556 |
| 195 | 0.71411 | 0.55645 |
| 198 | 0.71378 | 0.55742 |
| 201 | 0.71215 | 0.55748 |
| 204 | 0.71186 | 0.55651 |
| 207 | 0.71448 | 0.55658 |
| 210 | 0.71292 | 0.55758 |
| 213 | 0.71263 |         |
| 216 | 0.71096 |         |
| 219 | 0.71344 |         |
| 222 | 0.71315 |         |
| 225 | 0.71287 |         |
| 228 | 0.7126  |         |
| 231 | 0.7138  |         |
| 234 | 0.71353 |         |
| 237 | 0.71326 |         |
| 240 | 0.713   |         |
| 243 | 0.71413 |         |
| 246 | 0.7137  |         |
| 249 | 0.71344 |         |
| 252 | 0.71202 |         |
| 255 | 0.71411 |         |

---
